# Supplementary material
Source: Research Square preprint supplement (doi:10.21203/rs.3.rs-9227962/v1)
Supplement: Supplementary file 1 [file 5c61195bf3e3aaca6236fd17.xlsx]

## Sheet: 1. Baseline
ID	Dental plaque_Sample ID	Tongue plaque_Sample ID	Saliva__Sample ID	Periodontal condition	Age	Overweight	Smoker	Alcohol drinker	Tea drinker	Sugar intake	Teethbrush	Gender
A-001	PG001	PT001	SLN001	P	56	0	0	0	0	1	1	1		Overweight (Yes/No, BMI≥24);
A-002	PG002	PT002	SLN002	NP	53	0	0	0	0	0	1	1		Smoker (Yes/No, current or former smoker);
A-003	PG003	PT003	SLN003	P	58	0	0	1	1	0	0	0		Alcohol drinker (Yes/No, regular drinking, ≥1 time/week for more than 1 year);
A-004	PG004	PT004	SLN004	P	31	0	0	0	0	1	0	0		Tea drinker (Yes/No);
A-005	PG005	PT005	SLN005	P	39	0	0	0	1	1	1	1		Sugar intake (Yes/No);
A-006	PG006	PT006	SLN006	P	27	1	0	0	0	1	1	0		Teethbrush (Yes/No, ≥2 times a day);
A-007	PG007	PT007	SLN007	P	31	0	0	0	0	1	1	1		Gender (Female, Yes/No);
A-008	PG008	PT008	SLN008	P	45	1	0	0	0	1	1	0		*Yes=1; No=0
A-009	PG009	PT009	SLN009	NP	31	0	0	0	0	1	1	0
A-010	PG010	PT010	SLN010	NP	62	0	0	0	0	1	1	0
A-011	PG011	PT011	SLN011	NP	42	1	0	0	0	1	1	0
A-012	PG012	PT012	SLN012	P	45	0	0	0	0	1	1	1
A-013	PG013	PT013	SLN013	NP	33	0	0	0	1	1	0	0
A-014	PG014	PT014	SLN014	NP	42	1	1	0	1	0	1	0
A-015	PG015	PT015	SLN015	NP	43	0	1	0	1	1	1	1
A-016	PG016	PT016	SLN016	P	54	0	0	0	1	1	1	1
A-017	PG017	PT017	SLN017	NP	26	0	0	0	1	1	1	1
A-018	PG018	PT018	SLN018	NP	55	1	0	0	0	1	1	1
A-019	PG019	PT019	SLN019	P	50	1	1	1	1	1	0	0
A-020	PG020	PT020	SLN020	NP	55	0	0	0	1	1	0	1
A-021	PG021	PT021	SLN021	NP	27	0	0	0	0	1	1	1
A-022	PG022	PT022	SLN022	P	55	1	0	0	1	1	1	0
A-023	PG023	PT023	SLN023	NP	39	0	0	0	1	1	0	1
A-024	PG024	PT024	SLN024	NP	36	1	1	0	1	1	1	0
A-025	PG025	PT025	SLN025	NP	47	0	0	0	1	1	1	1
A-026	PG026	PT026	SLN026	P	46	0	0	0	0	1	1	0
A-027	PG027	PT027	SLN027	NP	47	0	0	0	1	1	1	1
A-028	PG028	PT028	SLN028	NP	36	0	0	0	0	1	0	1
A-029	PG029	PT029	SLN029	P	54	0	0	0	1	1	0	1
A-030	PG030	PT030	SLN030	NP	28	0	0	0	0	0	1	1
A-031	PG031	PT031	SLN031	P	52	0	0	0	0	1	0	1
A-032	PG032	PT032	SLN032	P	47	0	0	0	0	1	1	1
A-033	PG033	PT033	SLN033	P	26	0	0	0	0	1	0	0
A-034	PG034	PT034	SLN034	P	46	0	0	0	0	1	0	0
A-035	PG035	PT035	SLN035	NP	35	0	1	1	1	1	1	0
A-036	PG036	PT036	SLN036	P	49	0	0	0	1	1	1	1
A-037	PG037	PT037	SLN037	NP	48	1	1	1	1	1	1	0
A-038	PG038	PT038	SLN038	NP	29	1	0	0	0	1	0	0
A-039	PG039	PT039	SLN039	NP	40	0	0	0	1	1	1	1
A-040	PG040	PT040	SLN040	NP	42	0	0	0	0	1	0	0
A-041	PG041	PT041	SLN041	NP	47	0	0	0	0	1	0	1
A-042	PG042	PT042	SLN042	NP	26	0	0	1	1	1	1	1
A-043	PG043	PT043	SLN043	P	34	1	0	0	1	1	1	0
A-044	PG044	PT044	SLN044	P	57	0	0	0	1	1	1	1
A-045	PG045	PT045	SLN045	NP	52	0	0	0	0	1	0	0
A-046	PG046	PT046	SLN046	NP	62	0	0	0	0	1	0	1
A-047	PG047	PT047	SLN047	NP	29	0	0	0	1	1	1	1
A-048	PG048	PT048	SLN048	NP	26	0	0	0	0	1	1	1
A-049	PG049	PT049	SLN049	NP	26	0	0	0	0	1	0	0
A-050	PG050	PT050	SLN050	P	51	1	0	0	1	1	0	0
A-051	PG051	PT051	SLN051	P	59	1	1	1	1	1	0	0
A-052	PG052	PT052	SLN052	P	50	0	0	0	1	1	0	1
A-053	PG053	PT053	SLN053	NP	30	0	0	0	1	1	1	0
A-054	PG054	PT054	SLN054	NP	33	1	0	0	0	1	0	0
A-055	PG055	PT055	SLN055	NP	30	1	0	1	1	1	1	0
A-056	PG056	PT056	SLN056	NP	41	0	0	0	0	1	1	1
A-057	PG057	PT057	SLN057	NP	24	0	0	0	0	1	0	0
A-058	PG058	PT058	SLN058	P	28	0	0	0	0	1	1	1
A-059	PG059	PT059	SLN059	NP	27	0	0	0	0	1	1	1
A-060	PG060	PT060	SLN060	P	32	0	0	0	0	0	1	1
A-061	PG061	PT061	SLN061	P	46	1	0	0	0	1	1	1
A-062	PG062	PT062	SLN062	NP	36	0	0	0	0	1	1	0
A-063	PG063	PT063	SLN063	NP	35	0	0	0	1	1	1	1
A-064	PG064	PT064	SLN064	P	30	0	0	0	0	1	1	1
A-065	PG065	PT065	SLN065	NP	52	0	0	0	0	1	1	1
A-066	PG066	PT066	SLN066	P	56	0	0	0	1	1	1	1
A-067	PG067	PT067	SLN067	NP	24	0	0	0	0	1	1	0
A-068	PG068	PT068	SLN068	NP	26	0	1	0	0	1	0	0
A-069	PG069	PT069	SLN069	NP	23	0	0	0	0	1	0	0
A-070	PG070	PT070	SLN070	NP	46	0	1	0	1	1	1	0
A-071	PG071	PT071	SLN071	P	51	0	0	1	1	1	0	0
A-072	PG072	PT072	SLN072	NP	35	0	0	0	0	1	0	0
A-073	PG073	PT073	SLN073	NP	36	0	0	0	1	1	1	1
A-074	PG074	PT074	SLN074	NP	29	0	1	0	0	1	0	0
A-075	PG075	PT075	SLN075	NP	55	1	1	0	1	1	0	0
A-076	PG076	PT076	SLN076	NP	24	0	0	0	0	1	0	1
A-077	PG077	PT077	SLN077	NP	27	0	0	0	0	1	1	1
A-078	PG078	PT078	SLN078	P	31	0	0	0	0	1	1	0
A-079	PG079	PT079	SLN079	P	62	0	0	0	1	1	1	1
A-080	PG080	PT080	SLN080	P	26	1	1	0	0	1	1	0
A-081	PG081	PT081	SLN081	NP	35	0	0	0	0	1	0	1
A-082	PG082	PT082	SLN082	P	49	1	1	0	1	1	0	0
A-083	PG083	PT083	SLN083	NP	57	0	0	1	1	1	1	1
A-084	PG084	PT084	SLN099	P	68	0	0	0	0	1	1	1
A-085	PG085	PT085	SLN096	P	69	1	1	1	1	0	1	0
A-086	PG086	PT086	SLN093	P	72	0	0	0	1	0	1	0
A-087	PG087	PT087	SLN095	P	66	1	0	0	0	1	0	1
A-088	PG088	PT088	SLN090	NP	76	0	0	0	0	0	1	0
A-089	PG089	PT089	SLN094	NP	78	0	0	1	1	0	1	0
A-090	PG090	PT090	SLN087	NP	74	0	0	0	1	1	1	0
A-091	PG091	PT091	SLN086	NP	77	1	0	1	1	0	1	1
A-092	PG092	PT092	SLN085	P	74	0	0	0	0	1	1	1
A-093	PG093	PT093	SLN097	NP	66	0	0	0	1	1	1	1
A-094	PG094	PT094	SLN089	NP	67	0	1	0	1	0	1	0
A-095	PG095	PT095	SLN092	P	76	0	0	0	0	0	1	1
A-096	PG096	PT096	SLN084	NP	75	0	0	0	1	0	0	1
A-097	PG097	PT097	SLN088	P	77	0	0	0	0	0	0	1
A-098	PG098	PT098	SLN091	P	78	0	0	0	0	1	1	1
A-099	PG099	PT099	SLN098	P	64	0	1	1	1	0	0	0
A-100	PG100	PT100	SLN109	P	82	0	0	0	0	0	1	1
A-101	PG101	PT101	SLN119	P	81	0	1	0	1	0	1	0
A-102	PG102	PT102	SLN108	NP	78	0	0	0	0	1	1	0
A-103	PG103	PT103	SLN106	NP	72	0	0	0	1	0	1	0
A-104	PG104	PT104	SLN107	P	76	1	1	0	1	0	0	0
A-105	PG105	PT105	SLN111	NP	74	0	1	0	0	1	1	0
A-106	PG106	PT106	SLN113	P	73	1	0	0	1	0	1	1
A-107	PG107	PT107	SLN120	P	85	0	0	0	0	0	1	0
A-108	PG108	PT108	SLN118	P	70	1	0	0	0	0	1	1
A-109	PG109	PT109	SLN102	NP	68	0	0	0	0	0	1	1
A-110	PG110	PT110	SLN112	P	81	0	0	0	0	1	1	1
A-111	PG111	PT111	SLN115	P	76	0	1	1	1	0	0	0
A-112	PG112	PT112	SLN104	NP	70	1	0	0	1	1	1	1
A-113	PG113	PT113	SLN116	NP	66	0	1	0	0	0	0	0
A-114	PG114	PT114	SLN103	P	71	0	1	1	1	0	1	0
A-115	PG115	PT115	SLN101	NP	67	1	0	0	0	0	0	1
A-116	PG116	PT116	SLN100	NP	71	0	0	0	1	1	1	1
A-117	PG117	PT117	SLN105	NP	68	0	0	0	0	0	1	0
A-118	PG118	PT118	SLN117	P	79	1	0	0	0	0	0	1
A-119	PG119	PT119	SLN114	P	76	0	0	0	1	0	1	1
A-120	PG120	PT120	SLN110	NP	73	0	0	0	0	1	1	1

## Sheet: 2. the Age-stratified data
Variables	Prime-age_NP (n = 41)	Prime-age_P (n = 19)	Older_NP (n = 26)	Older_P (n = 34)	P
Age, Mean ± SD	33.80 ± 7.57	37.26 ± 8.74	66.27 ± 8.69	66.44 ± 11.12	<.001
Male, n(%)	21 (51.22)	10 (52.63)	12 (46.15)	14 (41.18)	0.803
Overweight, n(%)	7 (17.07)	6 (31.58)	5 (19.23)	10 (29.41)	0.463
Smoker, n(%)	8 (19.51)	2 (10.53)	4 (15.38)	8 (23.53)	0.698
Alcohol drinker, n(%)	4 (9.76)	0 (0.00)	3 (11.54)	8 (23.53)	0.089
Tea drinker, n(%)	18 (43.90)	4 (21.05)	12 (46.15)	21 (61.76)	0.041
Sugar-free diet, n(%)	2 (4.88)	1 (5.26)	11 (42.31)	16 (47.06)	<.001
Insufficient toothbrushing, n(%)	15 (36.59)	4 (21.05)	7 (26.92)	14 (41.18)	0.406

## Sheet: 3. RA of the top 20 genera
TaxID	Dental_plaque_P	Dental_plaque_NP	Tongue_plaque_P	Tongue_plaque_NP	Saliva_P	Saliva_NP
others	0.248980477008269	0.234630324598885	0.274183504870119	0.322717642377136	0.163910483061096	0.15732763374447
Alloprevotella	0.00669389649316151	0.00500235082075845	0.0133725270645426	0.0138393870497274	0.010127074499229	0.0143868427994731
Campylobacter	0.0122365132744192	0.0148617554217483	0.00855901776752683	0.00755357215583088	0.011495836682017	0.0155680394587984
Bacteroides	0.0143276181091308	0.00987187725204634	0.0208896862857741	0.0257252570088807	0.00179477350922292	0.00162723461022834
Acinetobacter	0.0195328871500543	0.019949465873167	0.0122262887818632	0.0230182510896775	0.000263686682786208	0.000264145084948885
Lactobacillus	0.00950152538750485	0.00655725021337121	0.0398234329470662	0.0282044942546788	0.00681863766719238	0.00444475182085872
Pseudomonas	0.00493226702548691	0.000829693709031346	0.00855052014668018	0.00305901419243289	0.0609080300304864	0.0227708405402144
Bradyrhizobium	0.0221178112250425	0.0379636823854226	0.0230273048513708	0.01902811319769	7.61683930996226e-06	0.000762134365859799
Lautropia	0.0245821799492019	0.0289818533343561	0.00632153357169138	0.00921494134679252	0.0209336711916023	0.022792140535597
Muribaculaceae	0.0260930799269602	0.0226053407613533	0.0583737254754471	0.0678816589687905	0.00274161875954449	0.0051741517575042
Fusobacterium	0.0387832998894353	0.0436710130779856	0.020665794247228	0.0237367780144955	0.0314660947811071	0.0358346155999024
Corynebacterium	0.0733053919569674	0.0639022018088528	0.0286066812883083	0.0169867704342725	0.0229208232700021	0.0147584887010387
Actinomyces	0.0375934138055614	0.0511547008918047	0.0243482164891579	0.0281520388676217	0.0403331453981476	0.0546726268159893
Porphyromonas	0.0279621388954263	0.0352550451444157	0.0288442728972641	0.0294307361114277	0.0656389558611428	0.0602340973945058
Rothia	0.0202245156382198	0.0169580638838611	0.0409585013304512	0.027146217511414	0.0767311068656419	0.070144909846246
Haemophilus	0.0247277938985875	0.0454210237858728	0.0438359069464696	0.0360326177916713	0.045806964805709	0.0610338775518047
Capnocytophaga	0.0717336291796794	0.0840458343180361	0.0109808015416998	0.0111618399088916	0.0490893956655129	0.0395591896738448
Leptotrichia	0.0804276463598024	0.0791317763741034	0.0246885528039975	0.0359132910404681	0.0440350694625209	0.0436428265531131
Neisseria	0.10963913171499	0.0831847714063008	0.0987234975786634	0.0936274769478378	0.082239428518299	0.0976413003495687
Prevotella	0.061933826949766	0.0447310759120417	0.106388827381421	0.108399520842089	0.122305924508315	0.13781889796055
Streptococcus	0.0646709561623104	0.0712908990266185	0.106631405733228	0.0691703808882131	0.140431661941202	0.139541254835493

## Sheet: 4. α diversity
Sample	chao1	shannon	Group
PG001	444.05	8.26177	Dental_plaque_P
PG002	147	4.7301	Dental_plaque_NP
PG003	257.333	6.51038	Dental_plaque_P
PG004	260.183	7.60707	Dental_plaque_P
PG005	179.1	6.10785	Dental_plaque_P
PG006	334.314	6.87194	Dental_plaque_P
PG007	320.29	6.05038	Dental_plaque_P
PG008	274.417	6.19814	Dental_plaque_P
PG009	318.127	6.89627	Dental_plaque_NP
PG010	222.8	5.73898	Dental_plaque_NP
PG011	230.1	7.35456	Dental_plaque_NP
PG012	209.2	5.78341	Dental_plaque_P
PG013	369.704	7.31163	Dental_plaque_NP
PG014	115.033	4.06977	Dental_plaque_NP
PG015	227.771	5.94272	Dental_plaque_NP
PG016	160	5.69213	Dental_plaque_P
PG017	138	5.19671	Dental_plaque_NP
PG018	144	6.02783	Dental_plaque_NP
PG019	139.902	5.0293	Dental_plaque_P
PG020	187.297	5.69765	Dental_plaque_NP
PG021	228.925	6.09408	Dental_plaque_NP
PG022	219.925	6.45095	Dental_plaque_P
PG023	340.762	7.15174	Dental_plaque_NP
PG024	195.9	7.04551	Dental_plaque_NP
PG025	196.591	3.12406	Dental_plaque_NP
PG026	183.8	5.91782	Dental_plaque_P
PG027	205.967	5.35586	Dental_plaque_NP
PG028	104	4.93473	Dental_plaque_NP
PG029	263.083	6.23915	Dental_plaque_P
PG030	276.95	6.60509	Dental_plaque_NP
PG031	204.052	5.9034	Dental_plaque_P
PG032	122	5.17056	Dental_plaque_P
PG033	191.75	6.75683	Dental_plaque_P
PG034	182	5.61221	Dental_plaque_P
PG035	287.734	6.32153	Dental_plaque_NP
PG036	222.958	5.98729	Dental_plaque_P
PG037	147.85	4.75507	Dental_plaque_NP
PG038	185.825	5.23883	Dental_plaque_NP
PG039	210.2	7.14497	Dental_plaque_NP
PG040	161.653	4.87658	Dental_plaque_NP
PG041	127	5.56859	Dental_plaque_NP
PG042	411.801	7.61857	Dental_plaque_NP
PG043	288.775	6.79022	Dental_plaque_P
PG044	235.027	6.28008	Dental_plaque_P
PG045	160.042	5.62489	Dental_plaque_NP
PG046	218.008	5.94353	Dental_plaque_NP
PG047	169.9	5.5386	Dental_plaque_NP
PG048	205.45	5.44213	Dental_plaque_NP
PG049	294.723	6.56332	Dental_plaque_NP
PG050	257.03	5.66085	Dental_plaque_P
PG051	222.064	5.89653	Dental_plaque_P
PG052	183.8	5.46249	Dental_plaque_P
PG053	187.93	5.58944	Dental_plaque_NP
PG054	208.733	4.96119	Dental_plaque_NP
PG055	486.392	7.30256	Dental_plaque_NP
PG056	183.97	5.91854	Dental_plaque_NP
PG057	226.692	5.05434	Dental_plaque_NP
PG058	190	5.49721	Dental_plaque_P
PG059	301.194	5.8805	Dental_plaque_NP
PG060	200.817	5.30294	Dental_plaque_P
PG061	305.9	6.47016	Dental_plaque_P
PG062	386.979	7.38877	Dental_plaque_NP
PG063	399.074	7.14987	Dental_plaque_NP
PG064	395.813	6.90501	Dental_plaque_P
PG065	244.763	6.80069	Dental_plaque_NP
PG066	168.058	5.39714	Dental_plaque_P
PG067	298.912	6.68793	Dental_plaque_NP
PG068	238.733	6.17252	Dental_plaque_NP
PG069	319.955	6.64036	Dental_plaque_NP
PG070	219.708	5.6901	Dental_plaque_NP
PG071	211.477	4.48702	Dental_plaque_P
PG072	334.006	6.70338	Dental_plaque_NP
PG073	220	5.72013	Dental_plaque_NP
PG074	231.933	6.03427	Dental_plaque_NP
PG075	217.1	6.40158	Dental_plaque_NP
PG076	201.333	5.44904	Dental_plaque_NP
PG077	218	5.75112	Dental_plaque_NP
PG078	251.686	6.25366	Dental_plaque_P
PG079	257.837	6.21144	Dental_plaque_P
PG080	295.853	6.44283	Dental_plaque_P
PG081	161.933	5.75807	Dental_plaque_NP
PG082	307.793	6.23704	Dental_plaque_P
PG083	339.067	7.23279	Dental_plaque_NP
PG084	1473.22	7.96307	Dental_plaque_P
PG085	926.245	9.48788	Dental_plaque_P
PG086	1503.03	9.54753	Dental_plaque_P
PG087	283.628	6.39999	Dental_plaque_P
PG088	258.167	4.6676	Dental_plaque_NP
PG089	265.995	6.10684	Dental_plaque_NP
PG090	294.54	6.74654	Dental_plaque_NP
PG091	499.232	6.7928	Dental_plaque_NP
PG092	1453.49	9.30552	Dental_plaque_P
PG093	355.21	6.63006	Dental_plaque_NP
PG094	283.267	6.53653	Dental_plaque_NP
PG095	304.233	7.71699	Dental_plaque_P
PG096	239.083	5.68736	Dental_plaque_NP
PG097	405.251	6.55316	Dental_plaque_P
PG098	189	5.34919	Dental_plaque_P
PG099	204.842	5.73996	Dental_plaque_P
PG100	405.869	5.98846	Dental_plaque_P
PG101	304.849	7.37153	Dental_plaque_P
PG102	395.858	5.60688	Dental_plaque_NP
PG103	412.175	6.03463	Dental_plaque_NP
PG104	358.094	6.8697	Dental_plaque_P
PG105	289.167	5.69369	Dental_plaque_NP
PG106	320.855	6.81698	Dental_plaque_P
PG107	203.975	6.07454	Dental_plaque_P
PG108	345.875	6.29812	Dental_plaque_P
PG109	356.095	6.75382	Dental_plaque_NP
PG110	281.249	5.30303	Dental_plaque_P
PG111	560.575	5.09907	Dental_plaque_P
PG112	216.9	6.24395	Dental_plaque_NP
PG113	251.837	6.40887	Dental_plaque_NP
PG114	166.958	3.7067	Dental_plaque_P
PG115	255.37	4.82548	Dental_plaque_NP
PG116	200.02	4.15907	Dental_plaque_NP
PG117	342.072	7.25627	Dental_plaque_NP
PG118	398.405	6.50208	Dental_plaque_P
PG119	220.033	5.81053	Dental_plaque_P
PG120	318.85	7.89075	Dental_plaque_NP
PT001	374.506	6.3857	Tongue_plaque_P
PT002	109.9	4.98067	Tongue_plaque_NP
PT003	424.771	6.45533	Tongue_plaque_P
PT004	121.894	4.00509	Tongue_plaque_P
PT005	350.141	6.90019	Tongue_plaque_P
PT006	369.994	5.95748	Tongue_plaque_P
PT007	285.219	5.62765	Tongue_plaque_P
PT008	147.032	4.81057	Tongue_plaque_P
PT009	251.333	6.3458	Tongue_plaque_NP
PT010	373.958	7.39826	Tongue_plaque_NP
PT011	650.752	9.06045	Tongue_plaque_NP
PT012	254	7.64367	Tongue_plaque_P
PT013	345	7.81197	Tongue_plaque_NP
PT014	407.408	8.39513	Tongue_plaque_NP
PT015	259.717	7.56641	Tongue_plaque_NP
PT016	349.033	6.88574	Tongue_plaque_P
PT017	248	7.42236	Tongue_plaque_NP
PT018	203.133	7.16796	Tongue_plaque_NP
PT019	367.788	6.55896	Tongue_plaque_P
PT020	119.05	5.14025	Tongue_plaque_NP
PT021	243.123	5.91002	Tongue_plaque_NP
PT022	558.789	8.7278	Tongue_plaque_P
PT023	318.312	7.82449	Tongue_plaque_NP
PT024	532.675	7.58127	Tongue_plaque_NP
PT025	346.92	7.80526	Tongue_plaque_NP
PT026	473.326	6.47763	Tongue_plaque_P
PT027	274.567	5.63484	Tongue_plaque_NP
PT028	137.958	4.5192	Tongue_plaque_NP
PT029	305.613	5.62397	Tongue_plaque_P
PT030	452.189	6.71085	Tongue_plaque_NP
PT031	327.05	7.45983	Tongue_plaque_P
PT032	343.925	6.57123	Tongue_plaque_P
PT033	350.991	5.82169	Tongue_plaque_P
PT034	229	6.68935	Tongue_plaque_P
PT035	316.129	5.86543	Tongue_plaque_NP
PT036	304.856	6.22234	Tongue_plaque_P
PT037	214.013	5.24194	Tongue_plaque_NP
PT038	226.628	4.5895	Tongue_plaque_NP
PT039	187.542	3.84069	Tongue_plaque_NP
PT040	511.52	8.12942	Tongue_plaque_NP
PT041	192.009	5.60925	Tongue_plaque_NP
PT042	199	7.21786	Tongue_plaque_NP
PT043	131.366	3.4318	Tongue_plaque_P
PT044	96.2	5.11	Tongue_plaque_P
PT045	400.033	8.18571	Tongue_plaque_NP
PT046	409.215	8.36055	Tongue_plaque_NP
PT047	310.742	7.7024	Tongue_plaque_NP
PT048	301.732	6.1444	Tongue_plaque_NP
PT049	127	4.62456	Tongue_plaque_NP
PT050	246.688	5.54814	Tongue_plaque_P
PT051	386.406	6.18571	Tongue_plaque_P
PT052	125	5.19208	Tongue_plaque_P
PT053	156.058	5.54233	Tongue_plaque_NP
PT054	553.239	7.6772	Tongue_plaque_NP
PT055	356.983	6.46787	Tongue_plaque_NP
PT056	260.564	5.53914	Tongue_plaque_NP
PT057	236.584	4.52436	Tongue_plaque_NP
PT058	170.9	5.12667	Tongue_plaque_P
PT059	128.497	4.71073	Tongue_plaque_NP
PT060	117.073	3.7768	Tongue_plaque_P
PT061	325.18	6.97727	Tongue_plaque_P
PT062	345.021	6.0267	Tongue_plaque_NP
PT063	280.92	5.60226	Tongue_plaque_NP
PT064	105	4.72621	Tongue_plaque_P
PT065	1368.02	8.98007	Tongue_plaque_NP
PT066	1384	8.62898	Tongue_plaque_P
PT067	1203	8.83933	Tongue_plaque_NP
PT068	723.599	7.12259	Tongue_plaque_NP
PT069	1007.02	8.58068	Tongue_plaque_NP
PT070	405.576	6.47141	Tongue_plaque_NP
PT071	168.975	5.11766	Tongue_plaque_P
PT072	1445.22	9.22107	Tongue_plaque_NP
PT073	182.087	5.00596	Tongue_plaque_NP
PT074	181	5.52111	Tongue_plaque_NP
PT075	230.322	5.57826	Tongue_plaque_NP
PT076	119.1	5.15085	Tongue_plaque_NP
PT077	318.075	5.89439	Tongue_plaque_NP
PT078	182.031	4.72971	Tongue_plaque_P
PT079	384.193	6.56542	Tongue_plaque_P
PT080	283.97	6.47087	Tongue_plaque_P
PT081	463.993	7.35459	Tongue_plaque_NP
PT082	300.85	6.0246	Tongue_plaque_P
PT083	726.728	7.79225	Tongue_plaque_NP
PT084	357.248	7.17321	Tongue_plaque_P
PT085	480.017	7.86459	Tongue_plaque_P
PT086	512.664	7.77447	Tongue_plaque_P
PT087	339.14	5.62071	Tongue_plaque_P
PT088	292.738	6.53659	Tongue_plaque_NP
PT089	465.988	5.15709	Tongue_plaque_NP
PT090	249.068	5.52451	Tongue_plaque_NP
PT091	194.424	4.90898	Tongue_plaque_NP
PT092	147	5.29432	Tongue_plaque_P
PT093	301.105	7.91021	Tongue_plaque_NP
PT094	473.853	7.82598	Tongue_plaque_NP
PT095	420.634	8.3201	Tongue_plaque_P
PT096	306.85	5.83225	Tongue_plaque_NP
PT097	645.096	6.98938	Tongue_plaque_P
PT098	558.924	7.241	Tongue_plaque_P
PT099	768.757	8.49415	Tongue_plaque_P
PT100	369	6.78193	Tongue_plaque_P
PT101	489.167	7.7803	Tongue_plaque_P
PT102	768.3	8.10183	Tongue_plaque_NP
PT103	840.776	8.9035	Tongue_plaque_NP
PT104	522.849	6.6746	Tongue_plaque_P
PT105	383.108	7.69982	Tongue_plaque_NP
PT106	697.105	8.65491	Tongue_plaque_P
PT107	661.432	7.44126	Tongue_plaque_P
PT108	763.155	7.98098	Tongue_plaque_P
PT109	459.118	7.53583	Tongue_plaque_NP
PT110	664.804	8.28266	Tongue_plaque_P
PT111	689.958	7.84776	Tongue_plaque_P
PT112	418.585	5.43549	Tongue_plaque_NP
PT113	826.213	8.66654	Tongue_plaque_NP
PT114	648.01	8.6486	Tongue_plaque_P
PT115	607.917	7.54131	Tongue_plaque_NP
PT116	510.234	8.0726	Tongue_plaque_NP
PT117	659.43	8.12056	Tongue_plaque_NP
PT118	563.357	8.15321	Tongue_plaque_P
PT119	469.595	8.06393	Tongue_plaque_P
PT120	819.317	8.58443	Tongue_plaque_NP
SLN001	164.071	4.29695	Saliva_P
SLN002	207.133	5.78558	Saliva_NP
SLN003	337.051	6.58985	Saliva_P
SLN004	177.911	4.7889	Saliva_P
SLN005	252.567	6.30013	Saliva_P
SLN006	316.24	5.65844	Saliva_P
SLN007	366.201	6.72392	Saliva_P
SLN008	237.983	5.82858	Saliva_P
SLN009	320.805	6.03734	Saliva_NP
SLN010	214.424	6.12091	Saliva_NP
SLN011	363.75	6.89619	Saliva_NP
SLN012	143.449	5.05115	Saliva_P
SLN013	225.934	6.32201	Saliva_NP
SLN014	301.571	6.44163	Saliva_NP
SLN015	255.069	6.113	Saliva_NP
SLN016	225.672	5.83046	Saliva_P
SLN017	361.865	6.42115	Saliva_NP
SLN018	355.159	6.96887	Saliva_NP
SLN019	344.703	6.73935	Saliva_P
SLN020	369.281	6.85674	Saliva_NP
SLN021	376.768	6.57334	Saliva_NP
SLN022	335.309	6.80873	Saliva_P
SLN023	270.001	5.93702	Saliva_NP
SLN024	243.96	6.51901	Saliva_NP
SLN025	226.999	5.89234	Saliva_NP
SLN026	515.652	7.26572	Saliva_P
SLN027	201.037	5.71668	Saliva_NP
SLN028	248.008	5.94397	Saliva_NP
SLN029	389.29	6.75034	Saliva_P
SLN030	276.82	6.11055	Saliva_NP
SLN031	301.682	5.41308	Saliva_P
SLN032	253.613	4.51619	Saliva_P
SLN033	220.19	5.90286	Saliva_P
SLN034	330.749	6.92937	Saliva_P
SLN035	285.867	5.70895	Saliva_NP
SLN036	280.07	6.29184	Saliva_P
SLN037	257.359	5.71197	Saliva_NP
SLN038	290.589	6.00341	Saliva_NP
SLN039	211.696	5.11181	Saliva_NP
SLN040	500.086	7.39856	Saliva_NP
SLN041	283.154	6.68133	Saliva_NP
SLN042	218.204	6.02367	Saliva_NP
SLN043	316.239	6.72754	Saliva_P
SLN044	146.841	0.7469765200048	Saliva_P
SLN045	229.165	6.17016	Saliva_NP
SLN046	216.905	5.91997	Saliva_NP
SLN047	160.847	4.7846	Saliva_NP
SLN048	130.82	3.67847	Saliva_NP
SLN049	239.169	5.58814	Saliva_NP
SLN050	292.118	6.45048	Saliva_P
SLN051	344.882	6.51139	Saliva_P
SLN052	225.896	5.82198	Saliva_P
SLN053	190.106	5.96438	Saliva_NP
SLN054	321.374	6.51757	Saliva_NP
SLN055	262.725	6.06094	Saliva_NP
SLN056	301.75	6.27061	Saliva_NP
SLN057	102.9	4.61213	Saliva_NP
SLN058	135.025	5.55024	Saliva_P
SLN059	125.138	4.65066	Saliva_NP
SLN060	173.862	4.69713	Saliva_P
SLN061	58	0.680412	Saliva_P
SLN062	472.805	6.13825	Saliva_NP
SLN063	418.253	6.41023	Saliva_NP
SLN064	181.453	4.96673	Saliva_P
SLN065	101.231	1.10924	Saliva_NP
SLN066	205.055	5.7751	Saliva_P
SLN067	178.121	5.33345	Saliva_NP
SLN068	176.044	3.91146	Saliva_NP
SLN069	387.753	6.80667	Saliva_NP
SLN070	244.202	6.29478	Saliva_NP
SLN071	367.886	6.72965	Saliva_P
SLN072	335.858	6.61471	Saliva_NP
SLN073	237.979	5.90834	Saliva_NP
SLN074	341.136	6.73089	Saliva_NP
SLN075	330.228	5.48374	Saliva_NP
SLN076	148.225	5.0268	Saliva_NP
SLN077	209.108	5.06924	Saliva_NP
SLN078	394.135	7.01601	Saliva_P
SLN079	394.155	6.79244	Saliva_P
SLN080	318.722	6.58084	Saliva_P
SLN081	179.001	5.03066	Saliva_NP
SLN082	307.765	6.83959	Saliva_P
SLN083	186.005	5.23748	Saliva_NP
SLN084	159.814	3.77191	Saliva_NP
SLN085	204.195	5.99568	Saliva_P
SLN086	300.205	6.16151	Saliva_NP
SLN087	300.101	6.71535	Saliva_NP
SLN088	216.994	5.78838	Saliva_P
SLN089	129.85	4.19666	Saliva_NP
SLN090	350.395	7.03648	Saliva_NP
SLN091	217.832	5.01637	Saliva_P
SLN092	286.275	6.33458	Saliva_P
SLN093	258.131	5.53029	Saliva_P
SLN094	328.829	6.27794	Saliva_NP
SLN095	257.553	5.1874	Saliva_P
SLN096	214.198	6.0077	Saliva_P
SLN097	192.094	5.88278	Saliva_NP
SLN098	305.429	6.63691	Saliva_P
SLN099	339.086	4.32246	Saliva_P
SLN100	188.97	5.62456	Saliva_NP
SLN101	215.251	5.52328	Saliva_NP
SLN102	201.782	4.54155	Saliva_NP
SLN103	329.122	6.50279	Saliva_P
SLN104	248.005	6.2592	Saliva_NP
SLN105	219.129	5.99021	Saliva_NP
SLN106	197.07	5.06814	Saliva_NP
SLN107	228.061	6.30734	Saliva_P
SLN108	232.949	5.4722	Saliva_NP
SLN109	259.993	5.8003	Saliva_P
SLN110	174.929	5.2798	Saliva_NP
SLN111	463.619	7.14006	Saliva_NP
SLN112	332.082	6.68072	Saliva_P
SLN113	389.226	7.1919	Saliva_P
SLN114	113.933	4.44859	Saliva_P
SLN115	313.137	6.99795	Saliva_P
SLN116	239.171	5.99989	Saliva_NP
SLN117	399.804	6.54221	Saliva_P
SLN118	255.574	6.55736	Saliva_P
SLN119	158.8	5.39713	Saliva_P
SLN120	246.921	5.96091	Saliva_P

## Sheet: 5. pcoa_braycurtis_feature_even
pc vector number	1	2
PG001	-0.255499	0.16830445222931423
PG002	-0.0304931	-0.208409
PG003	-0.106774	-0.111812
PG004	-0.254855	0.11069560616327291
PG005	0.05615475936967199	-0.227812
PG006	-0.0185909	-0.2464
PG007	0.05224671055339319	0.051591133894963705
PG008	-0.01415	-0.196224
PG009	-0.167637	-0.158598
PG010	0.03854181314089329	-0.272463
PG011	-0.26132	0.11090342282205179
PG012	-0.111979	-0.17949
PG013	-0.0738837	-0.205412
PG014	-0.0596067	-0.179842
PG015	-0.0755355	-0.170805
PG016	-0.0316124	-0.102576
PG017	-0.20675	-0.118007
PG018	-0.0883316	-0.206291
PG019	-0.0143099	-0.275209
PG020	-0.0565409	-0.241557
PG021	-0.0596445	-0.19353
PG022	-0.0900751	-0.250859
PG023	-0.0168134	0.2739508648053363
PG024	-0.264187	0.10560240767719652
PG025	-0.0814947	-0.177676
PG026	0.0172167427343838	-0.153382
PG027	-0.15416	-0.114993
PG028	-0.041246	-0.261085
PG029	-0.0949823	-0.160459
PG030	-0.0961452	-0.231629
PG031	0.023676775769240047	-0.318455
PG032	-0.0180741	-0.181723
PG033	-0.272856	0.11810173360610658
PG034	-0.0904492	-0.259081
PG035	-0.0133344	-0.280346
PG036	-0.108098	-0.272031
PG037	-0.0561589	-0.249293
PG038	-0.0697261	-0.221666
PG039	-0.254883	0.14857321949628913
PG040	-0.0439547	-0.248007
PG041	-0.0750791	-0.268331
PG042	-0.247257	-0.00423443
PG043	-0.132118	-0.10633
PG044	-0.0751775	-0.22375
PG045	-0.0798149	-0.230027
PG046	-0.0029998	-0.211292
PG047	0.03195191470411311	-0.129675
PG048	-0.0259882	-0.160075
PG049	0.037850915129640665	-0.204115
PG050	0.012650684321973724	-0.157077
PG051	0.0042720711379626046	-0.266058
PG052	-0.113294	-0.198971
PG053	-0.0509156	-0.240925
PG054	-0.0959352	-0.177542
PG055	-0.311651	0.12472373637766664
PG056	0.011441276650771024	-0.293952
PG057	-0.156088	-0.0262268
PG058	-0.161099	-0.0723396
PG059	-0.194411	-0.0954761
PG060	-0.263699	-0.0226241
PG061	-0.164517	-0.0262455
PG062	-0.0799564	-0.146777
PG063	-0.0530063	-0.252412
PG064	-0.192716	-0.0935109
PG065	-0.340487	0.09571598842300687
PG066	-0.0825686	-0.203407
PG067	-0.263218	-0.00446497
PG068	-0.0746227	-0.256934
PG069	-0.076513	-0.170978
PG070	-0.101877	-0.16796
PG071	-0.0603477	-0.187597
PG072	-0.024622	-0.258445
PG073	-0.114171	-0.150421
PG074	-0.00875783	-0.176153
PG075	-0.0998238	-0.21381
PG076	-0.0355148	-0.183538
PG077	-0.0948453	-0.139992
PG078	-0.0685306	-0.231135
PG079	-0.187315	-0.1772
PG080	-0.0788903	-0.210513
PG081	-0.0890997	-0.1647
PG082	-0.0983035	-0.145962
PG083	-0.148296	-0.034025
PG084	0.1159256801067549	0.20046724468486832
PG085	-0.269142	0.14074766564878077
PG086	-0.0329896	0.15255885934634292
PG087	-0.0696882	-0.190812
PG088	-0.183488	-0.0618182
PG089	-0.10931	-0.171925
PG090	-0.00359748	-0.0473964
PG091	-0.0370264	-0.128124
PG092	-0.0590048	0.19077535592763822
PG093	-0.0136241	-0.160007
PG094	-0.137189	-0.232563
PG095	-0.277393	0.1263629274673711
PG096	-0.0738555	-0.241631
PG097	-0.206401	-0.144791
PG098	-0.112965	-0.264041
PG099	-0.0553976	-0.193745
PG100	-0.177218	0.04731029356590192
PG101	-0.360722	0.18732005924231093
PG102	-0.375354	0.1866050383189455
PG103	-0.098607	-0.0576079
PG104	0.005019884279948171	0.059874960532192406
PG105	-0.385718	0.1984505299015739
PG106	-0.0895175	-0.1375
PG107	-0.0778663	0.029523908938025357
PG108	-0.231995	-0.00570388
PG109	-0.0666917	-0.0411434
PG110	0.039066644037583705	-0.0560418
PG111	0.03373300748574829	0.06427272023935329
PG112	-0.132749	-0.16785
PG113	-0.0879234	-0.148979
PG114	-0.0639585	-0.167429
PG115	-0.309889	0.2124941045480424
PG116	-0.0951288	-0.147232
PG117	-0.0559457	-0.136403
PG118	-0.274896	0.05723356402850199
PG119	-0.156279	0.028777726994735173
PG120	-0.277997	0.15043649320188557
PT001	0.03087137824896621	-0.117067
PT002	0.2399463368635733	0.1740539015826893
PT003	0.13971043545945414	-0.0026828
PT004	-0.0364755	-0.275573
PT005	0.19497338206687953	0.1052757959167542
PT006	0.2526853301842271	0.21294070303341678
PT007	-0.138605	-0.203146
PT008	0.18286562824426666	0.01653070841685149
PT009	0.19013633855627068	0.2299720346066978
PT010	-0.214835	0.12275782755654176
PT011	-0.230952	0.07589820226428957
PT012	-0.277956	0.14386352580477707
PT013	-0.155769	0.07270693472757067
PT014	-0.250395	0.13395808942130363
PT015	-0.23101	0.10749361132317038
PT016	0.23528429484073368	0.06936637525414968
PT017	-0.168067	0.10648437365568234
PT018	-0.184268	0.10994293009379608
PT019	0.09782051748172449	0.16326794988965246
PT020	0.1946265390181431	0.32155641451987066
PT021	0.2212360284752052	0.15617730712976982
PT022	-0.110546	0.08998967499185707
PT023	-0.167049	0.11814230413158167
PT024	-0.103464	0.1764557996955612
PT025	-0.0571817	0.1640538454608793
PT026	0.1549977541408276	-0.0655437
PT027	0.2698164763987323	0.021840557934559347
PT028	0.13388059929466795	0.060397719182972626
PT029	0.057026111891460264	0.07876620622290677
PT030	0.20149047116075838	0.24482009556319273
PT031	0.06428800053205076	0.1750846138825722
PT032	0.012724728781532892	0.19053294162181403
PT033	-0.178959	0.08964421094514456
PT034	-0.0515196	-0.0170131
PT035	0.2881399720098007	0.056031387647581685
PT036	0.19144788012140476	0.009197218813312999
PT037	0.21268227417932992	0.24500613423212753
PT038	0.1821562933759731	-0.0934601
PT039	-0.13373	-0.164449
PT040	-0.0620836	0.017978310921863996
PT041	0.27775202613910344	-0.0106451
PT042	-0.262792	0.1142729944412411
PT043	0.04998876260866616	0.2999781843678685
PT044	0.17793950090041757	0.06253917856056877
PT045	-0.146819	0.07375856149236515
PT046	-0.266035	0.137114862577981
PT047	-0.0699133	0.14362124440947605
PT048	0.05571251932241418	0.25625188724802755
PT049	0.22244842079756794	-0.0108561
PT050	0.2242218372522191	-0.0409529
PT051	0.07807424610089933	0.11570363634388256
PT052	0.171733756305016	0.05515895625687905
PT053	0.2556994023695088	0.03219058258670131
PT054	-0.082028	0.09604712059644072
PT055	-0.254585	0.14082502519576362
PT056	0.16539554290161382	0.09445742515712907
PT057	0.032606872474654255	0.203853642175252
PT058	0.21057468857120254	-0.0307244
PT059	0.2151284971475058	0.1007226363041126
PT060	0.17174322734746192	-0.0191306
PT061	-0.0461287	0.25947526027993906
PT062	0.23176175340592764	0.0819192598326755
PT063	0.13951417633406032	0.03182574221321564
PT064	0.21508110268102112	0.06508283475859845
PT065	-0.24362	0.15036859645440084
PT066	-0.0906456	0.10030533998440509
PT067	-0.26844	0.15264389830686936
PT068	0.09901793227682296	0.0023647109033598517
PT069	-0.294109	0.1631059678699879
PT070	0.26904842236612064	0.15363944155669848
PT071	0.22826119855211124	0.20298089671636563
PT072	-0.0729325	0.07034676096665787
PT073	0.23168445226719045	0.09660109410162755
PT074	0.1047131876321772	0.17509284042773848
PT075	0.2700193101979404	0.08513663009228992
PT076	0.20690722894869565	0.21396707434721576
PT077	0.06645571661074445	0.05579664244896281
PT078	0.17324477479797348	-0.0538435
PT079	-0.00967527	0.24074264991261746
PT080	-0.343586	0.1854168638034037
PT081	0.027836830412421087	0.26882033386458476
PT082	0.16717487232629208	0.177259174491533
PT083	0.008469431106901149	0.10116737104857776
PT084	0.09791339311223621	0.005828813862688508
PT085	-0.261616	0.10719123608715692
PT086	0.11956319316003998	0.19056693026026772
PT087	0.20773724785334022	0.22572572920129055
PT088	0.2358047709431667	0.07655864166378774
PT089	-0.0358053	-0.0927939
PT090	0.2546093961895403	-0.0195007
PT091	-0.161207	-0.0911378
PT092	0.09153143488074998	0.23486377514884008
PT093	-0.230214	0.12382007621174769
PT094	0.04177765859949537	0.030502765730950274
PT095	-0.215811	0.08301098413432483
PT096	0.0030410550606158634	-0.0898655
PT097	-0.0759078	0.12566234533308546
PT098	-0.297027	0.18938961408803762
PT099	-0.229057	0.164049115635276
PT100	-0.224683	0.1317525046731449
PT101	-0.367431	0.2263188071623381
PT102	-0.341701	0.21146161685520456
PT103	-0.250278	0.21793726086077503
PT104	0.11710277877128974	0.09025620551893387
PT105	-0.35413	0.19559632706847427
PT106	-0.20517	0.1816765355519618
PT107	-0.07043	-0.0405964
PT108	-0.255347	0.1617994509771847
PT109	-0.373322	0.206775826571084
PT110	-0.167615	0.19314676516061358
PT111	-0.125868	0.28874422714490966
PT112	-0.216542	-0.133281
PT113	-0.340669	0.20407030080369243
PT114	-0.152405	0.15101283118078157
PT115	-0.314792	0.19319799448877265
PT116	-0.130889	0.23277824955472748
PT117	-0.293717	0.15890486492768735
PT118	-0.260102	0.13806652746427991
PT119	-0.339576	0.1811874459385895
PT120	-0.310179	0.1964094574282706
SLN001	0.11476719291717956	-0.0136128
SLN002	0.2674696052603088	0.011420653030434904
SLN003	-0.0101683	-0.0850265
SLN004	0.14637422463908126	-0.0304865
SLN005	0.2357551268568885	0.04835764892116791
SLN006	0.20178454512853125	0.2653878852835938
SLN007	0.22903466610963913	0.1664021924255382
SLN008	0.1722749082852326	-0.0724246
SLN009	0.1543387394824254	-0.00484386
SLN010	0.20804769059191147	-0.128533
SLN011	0.05841079547692511	-0.224096
SLN012	0.096189701135585	-0.186662
SLN013	0.22943493035499718	-0.0309426
SLN014	0.22877272972890608	-0.00798978
SLN015	0.23042917904023866	0.002351187732240738
SLN016	0.24640921994414564	0.09170298352637161
SLN017	-0.005512	-0.0533272
SLN018	0.08573830399382197	-0.0573691
SLN019	0.02345142004273285	-0.0760899
SLN020	0.16458435209225908	0.006656912204556491
SLN021	0.08424490421783214	0.03371048015660203
SLN022	0.16593410379958903	-0.0129082
SLN023	0.17489005204790653	0.12048545917182103
SLN024	0.25509506236255775	0.20840864377729976
SLN025	0.2521074756761088	0.18786582056024909
SLN026	-0.0434067	-0.128111
SLN027	0.2194551611687971	0.07678068442971336
SLN028	-0.0415645	-0.252821
SLN029	0.03050215680550241	0.0033938949774843354
SLN030	0.22294227261909197	0.22028277848298045
SLN031	0.10142238803364287	0.03624701478694793
SLN032	0.10725373854899385	0.13538743157780733
SLN033	0.23734907481993522	-0.0222224
SLN034	-0.0126092	-0.212044
SLN035	0.2037245343737413	-0.0643586
SLN036	0.10106259496253474	-0.189765
SLN037	0.17966844013801986	0.18993219137956116
SLN038	0.1504758085216337	-0.18172
SLN039	0.08769637476344117	0.010663609261997761
SLN040	0.07151130491254414	0.0347268696911629
SLN041	0.19829800263887817	-0.175162
SLN042	0.2769013422184143	0.03529492613304982
SLN043	0.07024480238373096	-0.100816
SLN044	-0.134583	0.0709325732214635
SLN045	0.2303201304671119	-0.00699441
SLN046	0.17787123679760408	0.12637852721184964
SLN047	0.21224492553993807	0.12355674906176824
SLN048	0.017355944234206763	0.24730644322214002
SLN049	0.21458906161339852	-0.010936
SLN050	0.1724443525586596	-0.129642
SLN051	0.11083575426507909	-0.159036
SLN052	0.18581910380894173	-0.0656783
SLN053	0.14179449213746134	-0.156019
SLN054	0.15665608068389456	-0.0136062
SLN055	0.010663968991787832	-0.167532
SLN056	0.11738612578842815	-0.121609
SLN057	0.19589970868833173	0.07392622685127163
SLN058	0.08426751017745857	-0.121541
SLN059	0.21084161868541515	0.046255207331109535
SLN060	0.14675400370036676	-0.0274297
SLN061	-0.139953	0.10852911402837653
SLN062	-0.108895	0.02331419278940872
SLN063	0.08813323955161363	-0.104319
SLN064	0.19640694718557897	0.09582550323490525
SLN065	-0.109187	0.08747789212614274
SLN066	0.13052492472518062	-0.0614899
SLN067	0.21876890390863685	-0.0349787
SLN068	0.024000138188970482	-0.0950444
SLN069	0.152386078298076	0.03441861471265154
SLN070	0.2482783216459981	0.22118591365668325
SLN071	0.1264741937760443	-0.0787263
SLN072	0.2050897379802712	0.00383704554134082
SLN073	0.19980535026112767	0.0646863257561945
SLN074	0.07230892711946088	0.0414407251760527
SLN075	0.17820712782293857	-0.00388712
SLN076	0.1351702065512279	0.2504273187135953
SLN077	0.053333877010170366	-0.176106
SLN078	0.17658753273730157	-0.0566882
SLN079	0.10535376512788369	0.09355861964406127
SLN080	0.05647163168398085	-0.173665
SLN081	0.1567639930931297	0.3155795702349781
SLN082	0.0398848150417658	0.13078167890082512
SLN083	0.16001028559086553	-0.105588
SLN084	0.045424393703238405	-0.1219
SLN085	0.13557140173438753	0.15901366502275488
SLN086	0.2114975102818244	0.13728537026428062
SLN087	0.24668733550849603	0.12304166055653822
SLN088	0.12616957020259345	-0.106093
SLN089	0.1564826561975218	-0.0209183
SLN090	0.07712722402076634	0.062468875752777035
SLN091	-0.00101138	0.056908795140184286
SLN092	0.07857367066016355	-0.176865
SLN093	0.10226762147412766	-0.172846
SLN094	0.10539320533055577	-0.105052
SLN095	0.020145337885488012	0.11081730109018213
SLN096	0.26949280109359386	0.04798538281904041
SLN097	0.238216235684486	0.01102628004082279
SLN098	0.035498871831443145	-0.0347943
SLN099	-0.0753514	0.13771438810824457
SLN100	0.10273167449266925	0.23945572017156508
SLN101	0.058361126088276205	-0.145693
SLN102	0.16563449823771276	-0.00943509
SLN103	0.21008010786893447	-0.09935
SLN104	0.12077428840087841	0.05770398304543949
SLN105	0.11337764580554101	0.10423562301820323
SLN106	0.08932161410464746	-0.177631
SLN107	0.22246757649990634	0.061585430449012685
SLN108	0.1762597516288402	0.12694219009768457
SLN109	0.18665574066959173	-0.0417065
SLN110	0.21000243660459914	0.10706489144945558
SLN111	-0.10062	-0.0244777
SLN112	0.20086263134515261	0.182481520542412
SLN113	0.012171291151371564	0.03986266352220087
SLN114	0.025923728924806436	0.08542061245320494
SLN115	0.10394235597526169	-0.0819743
SLN116	0.15829362943775271	0.1706931175839267
SLN117	0.04219157702774212	0.09588387826153454
SLN118	0.08899082448208163	-0.126222
SLN119	-0.0606926	-0.0189793
SLN120	0.110235499578545	-0.161736
eigvals	10.30147913359095	8.380034859457696
% variation explained	7.20432	5.86056

## Sheet: 6. LEfSe
Biomarker	Logarithm value	Groups	LDA_value	p-value
Lawsonella	1.93753	Dental_plaque_P	2.94707	0.00491397079502
Dialister	3.48146	Dental_plaque_P	2.86111	0.00360542325281
Anaerostipes	2.6722	Dental_plaque_P	2.54371	0.0115725420883
Parasutterella	2.74705	Dental_plaque_P	2.48558	0.0101868271495
Enterorhabdus	2.40919	Dental_plaque_P	2.44463	0.0346947687135
f__Ruminococcus__torques_group	2.81935	Dental_plaque_P	2.43778	0.0222281317802
Erysipelotrichaceae_UCG_003	2.32266	Dental_plaque_P	2.42891	0.0318236
Atopobium	2.93659	Dental_plaque_P	2.41687	0.0307281907364
Bergeyella	3.95175	Dental_plaque_NP	3.15955	0.0483217215782
Amnipila	2.3854	Dental_plaque_P	2.41398	0.0300247764824
Biomarker	Logarithm value	Groups	LDA_value	p-value
Streptococcus	5.04366	Tongue_plaque_P	4.299	0.0472095738831
Rothia	4.62967	Tongue_plaque_P	3.90793	0.00953632423272
Corynebacterium	4.48453	Tongue_plaque_P	3.80819	0.0197708570879
Desulfobulbus	1.2132	Tongue_plaque_P	3.13017	0.0227759161391
Aggregatibacter	3.63518	Tongue_plaque_P	3.12658	0.0258191384094
Clade_Ia	1.28725	Tongue_plaque_NP	2.94795	0.0431267807475
Cardiobacterium	3.29453	Tongue_plaque_P	2.78003	0.0497024515051
Oscillibacter	3.12508	Tongue_plaque_NP	2.67059	0.0295617088615
f__Eubacterium__brachy_group	2.23124	Tongue_plaque_P	2.61928	0.00673715976676
Abiotrophia	2.82947	Tongue_plaque_P	2.61048	0.0378414567242
Biomarker	Logarithm value	Groups	LDA_value	p-value
Treponema	4.23532	Saliva_P	3.73046	0.00347086535449
Corynebacterium	4.3642	Saliva_P	3.64181	0.00810526508365
Alloprevotella	4.16113	Saliva_NP	3.48358	0.0437855935786
Oribacterium	3.9927	Saliva_NP	3.35686	0.00261546884201
Lachnoanaerobaculum	3.85979	Saliva_NP	3.24795	0.00153377433667
Lentimicrobium	3.59966	Saliva_P	3.15755	0.0249540980706
F0058	3.68709	Saliva_P	3.12144	0.00114021730223
Tannerella	3.78514	Saliva_P	3.07215	0.00697685272763
Stomatobaculum	3.54141	Saliva_NP	2.9093	0.0197413601434
Comamonas	3.58133	Saliva_P	2.83658	0.0352662453604

## Sheet: 7. RF
Taxonomy	Dental_plaque_NP	Dental_plaque_P	MeanDecreaseAccuracy	MeanDecreaseGini
Aerococcus	0.2404253666245	5.40804169294256	4.39978365743351	1.36831228424089
Dialister	3.86924920276703	-0.573293	2.80264142506112	1.26918278864716
Haemophilus	1.40527165206242	-1.74147	0.199991670097062	0.886813038751116
Prevotella	0.25298971960842	-0.87073	-0.255956	0.877859671749413
Neisseria	-0.36869	0.227258463806076	-0.150826	0.861508474965029
Campylobacter	2.92524183812301	-1.69732	1.41931451793748	0.801434540900599
Bergeyella	2.13524848388124	-2.73144	-0.228221	0.796787315976624
Granulicatella	0.383636546726998	-0.408136	-0.0449898	0.791157066281165
Muribaculaceae	-1.17505	2.82063309841623	0.997165550847108	0.788639441305048
Jeotgalicoccus	-0.977319	3.30307706520311	1.27676574781087	0.784267724569816
Taxonomy	Tongue_plaque_NP	Tongue_plaque_P	MeanDecreaseAccuracy	MeanDecreaseGini
Porphyromonas	3.15340652181688	2.48481657734777	4.06547456759954	1.26294421097292
Rothia	-0.512192	2.76444987494609	1.36213768592605	1.12148278624765
Aggregatibacter	3.56455174520527	0.969423130391818	2.89415930413153	1.04713946576695
Granulicatella	-2.23595	3.0280499541935	0.259964953829221	1.02690955521727
Corynebacterium	-0.970645	1.36064645318036	0.253499522620442	0.994678745606052
Fusobacterium	3.00718893658537	-0.45841	1.97976875272818	0.967154844323169
Alloprevotella	0.00877298683075311	0.285101187443284	0.236863002337311	0.950284214666187
Streptococcus	-2.12249	0.580745584701608	-0.990839	0.876356533505072
Campylobacter	0.600857639002163	-2.42478	-0.898605	0.821578673182025
Capnocytophaga	-0.0225826	-0.14339	-0.127161	0.784149318248704
Taxonomy	Saliva_NP	Saliva_P	MeanDecreaseAccuracy	MeanDecreaseGini
F0058	4.27482160284337	3.68617803024335	4.80620271171399	1.82884876624636
Tannerella	0.526220247929617	1.33714344124746	1.19214578993666	1.73168418853944
Lachnoanaerobaculum	2.49403630010994	2.29332800538241	3.20749405559803	1.72390100506549
Treponema	3.55687445377458	2.98930053076512	4.35702678533808	1.63389834631165
Oribacterium	2.10393889310573	1.36128247668425	2.20103932503778	1.61736334526997
Corynebacterium	3.16333268875296	1.93122584502517	3.20418136578401	1.34325294316245
Defluviitaleaceae_UCG.011	4.49049899965725	-0.281428	3.28830327751483	1.23485937907309
Aggregatibacter	1.92694949890894	1.16201957861553	1.96090272363277	1.00542400997715
Comamonas	2.02207516902282	0.519786848484717	1.84224628688542	0.96318992528905
Lentimicrobium	1.25996867932732	0.735610771006865	1.66148576317407	0.923013202207932

## Sheet: 8. RF Age-stratified
Taxonomy	Dental.plaque_Prime.age_NP	Dental.plaque_Prime.age_P	MeanDecreaseAccuracy	MeanDecreaseGini
Carnobacterium	5.04991785213405	5.02360942977835	5.5977344789355	0.603488523535661
Rodentibacter	3.79964871969137	3.54688905558253	3.95236798523791	0.553288777089909
Parasutterella	1.79990592350392	0.112301666976908	1.25493557966036	0.508620702792866
Aerococcus	-0.158444	1.69640301502363	0.92693337418703	0.500688476299287
Romboutsia	1.89970594496411	2.98915330684505	2.72387780996897	0.48853412687421
Muribaculaceae	0.401811765198938	-0.95236	-0.342215	0.463852406925181
Comamonas	-0.809877	0.222207594419257	-0.484009	0.4571896035471
Lactobacillus	1.87710335192338	2.16470181365423	2.83857966620234	0.443815916737785
Acinetobacter	-1.16244	1.96492543132143	0.290475871464255	0.432570633844905
Neisseria	1.43288484823483	-1.85785	0.00261322969115773	0.420686604851915
Taxonomy	Dental.plaque_Older_NP	Dental.plaque_Older_P	MeanDecreaseAccuracy	MeanDecreaseGini
Comamonas	4.14558046495032	2.25401464757945	4.28107055909215	1.01393004731967
Dialister	2.44127230148813	2.86856583740127	3.31707798408336	0.828756807680257
Porphyromonas	1.67544906188402	1.23579376504132	2.05049819267529	0.726282931585121
Rothia	0.912998976133426	1.68334353651614	2.17264435312249	0.714097999029584
Campylobacter	2.12840984897177	1.10115604331261	2.19259922482318	0.693719724658028
Clostridia_UCG.014	-0.0698579	0.854433286714494	0.613640312664953	0.515612889019472
Eikenella	2.06290488996388	0.255173214413909	1.66101710243849	0.461460660178926
Bergeyella	1.2016090848781	0.577822905663942	1.14811064265254	0.450059200108785
Absconditabacteriales_.SR1.	-1.21246	-3.54456	-3.22959	0.448185618007585
Corynebacterium	-1.62581	2.30063483777091	0.553941504286744	0.438181743165818
Taxonomy	Tongue.plaque_Prime.age_NP	Tongue.plaque_Prime.age_P	MeanDecreaseAccuracy	MeanDecreaseGini
Fusobacterium	3.81945626791088	3.84989063649768	4.48977007431656	0.829950995317895
Granulicatella	0.592044052510154	2.03969358417051	1.32757242045116	0.692201157337751
Neisseria	1.29382774669573	0.963836515520098	1.50706742369738	0.585288318913853
Aggregatibacter	2.51864488889478	1.57714024087641	2.5890813939662	0.560988473590721
Alloprevotella	1.45870869891831	0.463980222612222	1.35058111118623	0.511706907329079
Amnipila	0.140850422423152	2.42201022728225	1.6228105187944	0.439668965915398
Lentimicrobium	1.21523251113103	2.01936140459144	1.90504469106431	0.426971564361409
Streptococcus	-0.868218	-0.226267	-0.752737	0.408421095816467
Subdoligranulum	1.98614963346123	0.972582225726396	2.44768082774238	0.400421962560901
Rothia	2.11332481361351	0.365624608602882	1.73153634735321	0.385483312416319
Taxonomy	Tongue.plaque_Older_NP	Tongue.plaque_Older_P	MeanDecreaseAccuracy	MeanDecreaseGini
Actinomyces	3.99169967327549	3.12208266308942	4.0408871840029	0.937637213293835
Porphyromonas	5.11245686279138	-1.76912	2.14593213274447	0.892273433034119
Peptostreptococcus	3.19841985329787	2.02204025847646	3.10757736504503	0.737796591857663
Leptotrichia	1.77336550032338	-1.83477	0.0592654327557894	0.730952729242378
Gemella	1.60481564643798	1.79424958588008	1.96783926337939	0.728138954651675
Haemophilus	1.72410792659749	2.57662830580204	2.46199581390777	0.678896830333262
Rothia	1.42767124864941	1.39879693950888	1.89423318201231	0.593980989429297
Campylobacter	2.68846236331765	0.0923903726099547	2.35540650694888	0.534104238895155
Streptococcus	2.57184455453183	2.24235754210122	2.90322095587388	0.483055725016779
Atopobium	0.0365199469330629	0.0979789707601687	0.209122558356758	0.468181208339625
Taxonomy	Saliva_Prime.age_NP	Saliva_Prime.age_P	MeanDecreaseAccuracy	MeanDecreaseGini
Veillonella	1.62746081667367	0.797459816712154	1.36077	0.90324825476522
Rikenellaceae_RC9_gut_group	3.98967203727132	5.17956041488189	5.41314179148913	0.85711959325252
Catonella	1.60107150191539	3.88891610569048	3.60828119239027	0.722587554712129
Oribacterium	-0.355442	1.00656844925018	0.0331740911903976	0.604995970170559
Bergeyella	2.02669799092402	2.00089886253224	2.57720914436983	0.604212730481386
F0058	-0.545009	1.13682279239973	0.112402828272254	0.586578245302876
Lentimicrobium	1.53118097385135	1.21740788143189	1.71585832472445	0.556624821784286
Scardovia	2.72977199308976	2.02856197990492	2.96306838336923	0.500714732763775
Granulicatella	0.629637241923491	-2.02512	-0.499859	0.47899842915159
Alloprevotella	-0.916097	-0.777435	-1.00027	0.475187673300509
Taxonomy	Saliva_Older_NP	Saliva_Older_P	MeanDecreaseAccuracy	MeanDecreaseGini
Corynebacterium	4.53760136739648	2.16199306387139	4.26623375304834	1.08321209177081
Tannerella	-0.0815767	1.22562673512693	0.709876103279078	0.893289037977363
Rikenellaceae_RC9_gut_group	1.7805218129645	-1.25819	-0.0301758	0.777290293533806
Solobacterium	0.340708129156778	0.501984510854095	0.549398956253286	0.753094209428392
Defluviitaleaceae_UCG.011	2.57489492807924	1.73016024582936	2.73469996304743	0.71840600457308
Treponema	2.93484398898415	2.8316352345547	3.72740003034429	0.646225957794878
Stomatobaculum	0.791677019269732	0.152662982541729	0.440967669033053	0.639475457997903
F0058	1.62150859122997	0.982020078442765	1.41712356105023	0.61042139788077
Oribacterium	-0.101283	0.718836240658934	0.251213172119467	0.578857361321582
Fusobacterium	0.897913858792309	0.82594149818973	1.19974121279388	0.486667931993924

## Sheet: 9. Optimal Model Performance
	Model Name	Implementation	Mean AUC	AUC Std	Accuracy	Sensitivity	Specificity
LEfSe_Dental plaque	Boosting Method	gbm	0.627	0.008	0.6	0.434	0.731
LEfSe_Tongue plaque	PLSModel	pls	0.683	0	0.642	0.396	0.836
LEfSe_Saliva	PLSModel	pls	0.716	0	0.692	0.453	0.881
RF_Dental plaque	Boosting Method	gbm	0.694	0.006	0.658	0.491	0.791
RF_Tongue plaque	AdaptiveBoosting	AdaBoost.M1	0.65	0.022	0.608	0.528	0.672
RF_Saliva	Boosting Method	gbm	0.734	0.008	0.683	0.604	0.746
RF_Dental plaque_Prime-age	AdaptiveBoosting	AdaBoost.M1	0.738	0.007	0.733	0.316	0.927
RF_Dental plaque_Older	Boosting Method	gbm	0.73	0.021	0.683	0.794	0.538
RF_Tongue plaque_Prime-age	Lasso	glmnet	0.765	0	0.733	0.474	0.854
RF_Tongue plaque_Older	AdaptiveBoosting	AdaBoost.M1	0.738	0.017	0.7	0.735	0.654
RF_Saliva_Prime-age	AdaptiveBoosting	AdaBoost.M1	0.807	0.025	0.767	0.474	0.902
RF_Saliva_Older	PLSModel	pls	0.743	0	0.683	0.853	0.462

## Sheet: 10. Functional predictions
Index	PG009	PG011	PG013	PG014	PG015	PG017	PG021	PG023	PG024	PG025	PG027	PG028	PG030	PG035	PG037	PG038	PG039	PG040	PG041	PG042	PG047	PG048	PG049	PG053	PG054	PG055	PG056	PG057	PG059	PG062	PG063	PG067	PG068	PG069	PG070	PG072	PG073	PG074	PG076	PG077	PG081	PG004	PG005	PG006	PG007	PG008	PG012	PG026	PG032
PWY-7200	-0.0123331	-0.187132	-0.116497	0.296718	1.433857e-01	1.463083e-01	-0.163148	-0.170714	-0.0651595	0.518935	2.202345e-01	0.210132	2.290738e-02	0.0759178	0.291641	0.171637	-0.0789788	0.0368438	0.136494	-0.00449371	7.889019e-02	-0.228466	4.487611e-02	2.992633e-03	-0.139659	3.280264e-02	1.567004e-01	0.292655	0.290479	-0.0635323	5.168609e-02	0.0122581	0.0927453	-0.147621	1.681884e-01	1.436771e-02	1.423386e-01	-0.0871653	2.017338e-01	0.247058	0.0738156	-0.18617	-0.0465649	6.601488e-03	7.067385e-02	2.165180e-02	0.0382135	-0.141368	-0.0676835
PWY-5695	1.686805e-01	-0.322094	-0.0597016	0.133434	1.049481e-01	2.098622e-01	-0.148414	-0.0945231	-0.248283	0.323919	2.210404e-01	0.0142289	5.103842e-02	0.0682306	0.226992	0.0926593	-0.369998	-0.22622	-0.0136655	-0.0883728	7.678254e-02	-0.0797106	6.439594e-02	9.890434e-02	-0.216201	1.538101e-01	9.184979e-02	0.274013	0.188673	0.112914	5.025907e-02	0.00997761	0.074593	-0.0929578	2.687289e-01	8.050655e-02	1.831550e-01	1.097025e-01	2.041466e-01	0.330627	0.224632	-0.342386	3.626641e-02	8.288207e-02	-0.153507	-0.115283	-0.113715	6.296852e-02	-0.0734335
PWY-7385	-1.47934	-1.47934	-1.47934	-1.47934	-1.47934	-1.47934	-1.47934	-1.47934	-1.47934	-1.47934	-1.47934	-1.47934	-1.47934	-1.47934	-1.47934	-1.47934	-1.47934	-1.47934	-1.47934	-1.47934	-1.47934	-1.47934	-1.47934	-1.47934	-1.47934	-1.47934	-1.47934	-1.47934	-1.47934	-1.47934	-1.47934	-1.47934	-1.47934	-1.47934	-1.47934	-1.47934	-1.47934	-1.47934	-1.47934	-1.47934	-1.47934	-1.47934	-1.47934	-1.47934	-1.47934	-1.47934	-1.47934	-1.47934	-1.47934
CODH-PWY	1.512342e+00	-18.6972	2.531697e+00	-18.6972	1.832675e+00	1.101901e+00	2.59091	-0.597523	1.868124e+00	0.752294	-2.24295	-0.406131	1.341570e+00	0.381389	-0.201983	-2.04887	-18.6972	-0.228129	0.273657	-3.09011	-0.0641103	1.77613	4.448338e-01	1.838201e+00	0.983582	9.096773e-01	1.419092e+00	0.238082	1.4422	2.41301	1.476071e+00	-0.220585	0.92218	1.624405e+00	1.326794e+00	3.181197e-01	5.247875e-01	6.702150e-01	9.479527e-01	1.64181	-18.6972	1.73596	7.684071e-01	1.932695e+00	1.815023e-01	1.580703e+00	1.75817	8.770023e-01	-0.501702
PWY-6944	-2.04387	-2.04387	-2.04387	-2.04387	-2.04387	-2.04387	-2.04387	-2.04387	-2.04387	-2.04387	-2.04387	-2.04387	-2.04387	-2.04387	-2.04387	-2.04387	-2.04387	-2.04387	-2.04387	16.1672	-2.04387	-2.04387	-2.04387	-2.04387	-2.04387	-2.04387	-2.04387	-2.04387	-2.04387	-2.04387	-2.04387	-2.04387	-2.04387	-2.04387	-2.04387	-2.04387	-2.04387	-2.04387	-2.04387	-2.04387	-2.04387	-2.04387	-2.04387	-2.04387	-2.04387	-2.04387	-2.04387	-2.04387	-2.04387
PWY-5651	-6.84893	12.9719	-6.84893	-6.84893	-6.84893	-6.84893	10.5157	1.209591e+01	1.351409e+01	-6.84893	-6.84893	-6.84893	9.663546e+00	10.7632	-6.84893	-6.84893	-6.84893	-6.84893	-6.84893	-6.84893	-6.84893	-6.84893	9.653623e+00	-6.84893	-6.84893	1.158267e+01	-6.84893	-6.84893	-6.84893	9.47522	8.974302e+00	11.2702	9.30393	-6.84893	-6.84893	-6.84893	-6.84893	-6.84893	8.285719e+00	-6.84893	-6.84893	12.8284	-6.84893	1.035519e+01	-6.84893	-6.84893	10.5151	-6.84893	-6.84893
NADSYN-PWY	-7.02654	13.2496	-7.02654	-7.02654	-7.02654	-7.02654	10.8059	1.238108e+01	1.377835e+01	-7.02654	-7.02654	-7.02654	9.955076e+00	11.0536	-7.02654	-7.02654	-7.02654	-7.02654	-7.02654	-7.02654	-7.02654	-7.02654	9.945138e+00	-7.02654	-7.02654	1.187165e+01	-7.02654	-7.02654	-7.02654	9.76716	9.266281e+00	11.5593	9.59566	-7.02654	-7.02654	-7.02654	-7.02654	-7.02654	8.577847e+00	-7.02654	-7.02654	13.1082	-7.02654	1.064620e+01	-7.02654	-7.02654	10.8053	-7.02654	-7.02654
PWY-6992	-1.34435	-1.34435	-1.34435	-1.34435	-1.34435	-1.34435	-1.34435	-1.34435	-1.34435	-1.34435	-1.34435	-1.34435	-1.34435	-1.34435	-1.34435	-1.34435	-1.34435	-1.34435	-1.34435	-1.34435	-1.34435	-1.34435	-1.34435	-1.34435	-1.34435	-1.34435	-1.34435	-1.34435	-1.34435	-1.34435	-1.34435	-1.34435	-1.34435	-1.34435	-1.34435	-1.34435	-1.34435	-1.34435	-1.34435	-1.34435	-1.34435	-1.34435	-1.34435	-1.34435	-1.34435	-1.34435	-1.34435	-1.34435	-1.34435
PWY-7196	-0.0573257	-0.129097	-0.0819641	0.243343	2.001527e-01	1.816267e-01	-0.121871	-0.175581	-0.026293	0.416828	8.408369e-03	0.214593	2.395070e-02	0.104403	0.236783	0.0892541	-0.0336317	0.0663097	0.133422	0.0177024	-0.0219922	-0.250775	3.166422e-02	-0.0276383	-0.250541	9.726930e-02	9.781857e-02	0.159068	0.182524	-0.0395853	6.939803e-02	0.0430417	0.116006	-0.12849	4.275419e-02	-0.0299738	7.141469e-02	-0.149332	1.216358e-01	0.161757	-0.047967	-0.102462	-0.102131	-0.00273147	1.137406e-01	1.038957e-01	0.058791	-0.224073	9.655550e-03
DENOVOPURINE2-PWY	-0.0507211	-0.237723	-0.105701	0.266269	1.012277e-01	1.787486e-01	-0.174263	-0.231629	-0.181693	0.306004	1.532277e-01	0.201117	9.657800e-02	0.100164	0.242192	0.213007	-0.162942	0.158345	0.188947	-0.0522714	9.821471e-02	-0.236395	6.026978e-02	3.887889e-02	-0.1566	2.808468e-02	1.038853e-01	0.223955	0.160868	-0.0489724	1.786553e-02	0.0438296	0.0464718	-0.139245	1.569342e-01	4.779495e-04	1.393275e-01	-0.0915024	1.676819e-01	0.20545	0.0102956	-0.236091	-0.0592754	-0.0313589	1.989547e-03	2.172471e-02	0.0925809	-0.172671	8.228552e-02
Index	PT009	PT011	PT013	PT014	PT015	PT017	PT021	PT023	PT024	PT025	PT027	PT028	PT030	PT035	PT037	PT038	PT039	PT040	PT041	PT042	PT047	PT048	PT049	PT053	PT054	PT055	PT056	PT057	PT059	PT062	PT063	PT067	PT068	PT069	PT070	PT072	PT073	PT074	PT076	PT077	PT081	PT004	PT005	PT006	PT007	PT008	PT012	PT026	PT032
COBALSYN-PWY	0.378444	3.251415e-01	7.717494e-03	5.528684e-01	1.285135e-01	-0.144382	0.166894	-0.0211106	0.666381	-0.016982	-0.0557462	1.875384e-01	3.227200e-01	-0.222961	-0.799118	-0.63115	0.204682	1.141653e-01	0.0849969	2.830812e-01	3.205636e-02	-0.525143	1.083250e-01	-0.31779	2.127722e-01	5.548439e-01	-0.0482038	0.112682	0.572302	-0.0248896	-0.162223	0.325412	-0.102659	0.365103	0.14971	0.22816	-0.449548	-0.0149494	-0.154831	-0.247257	0.308599	-0.323875	0.141246	-0.443799	0.136111	-0.552968	-0.0803561	2.176885e-01	-0.201422
PWY1G-0	-1.96268	-0.751419	-0.944815	-4.65869	-2.15919	-0.550314	0.698605	0.212993	-2.01007	-0.0135932	-1.42576	-2.24422	-0.409308	-0.331565	0.436067	-1.45377	1.99938	6.132399e-02	0.503074	-0.111477	-0.995902	2.240251e-01	-0.716087	-0.310951	1.149255e+00	-1.52038	-1.16926	0.120608	-1.09794	-0.449828	-1.66265	-0.514023	0.287838	-0.629208	-0.94313	0.993705	2.444444e-01	1.544505e+00	-0.534429	-0.12638	0.552134	2.00081	-0.558566	3.790110e-01	1.15098	8.837909e-01	-0.825824	8.578237e-01	0.672598
PWY-5509	0.411816	3.675781e-01	2.879664e-02	5.646959e-01	1.523367e-01	-0.136347	0.198094	-0.0111364	0.680097	-0.00140602	-0.00636448	2.272537e-01	3.519346e-01	-0.187327	-0.775542	-0.583256	-1.69004	1.399307e-01	0.121582	2.770709e-01	5.315182e-02	-0.517351	1.571203e-01	-0.288666	2.348557e-01	5.860557e-01	-0.00234482	0.146224	0.617752	0.011001	-0.120678	0.341886	-0.0748062	0.38195	0.182798	0.13461	-0.418252	2.596936e-02	-0.120093	-0.208776	0.335874	-1.24861	0.166887	-0.413739	0.177129	-0.52502	-0.0637145	2.556985e-01	-0.173908
PWY-6269	0.413848	3.667750e-01	3.364511e-02	5.668188e-01	1.551961e-01	-0.136623	0.199047	-0.00231626	0.680637	9.468189e-04	-0.0145542	2.214636e-01	3.507963e-01	-0.19111	-0.776215	-0.590969	-1.71249	1.414148e-01	0.116771	2.810567e-01	5.555013e-02	-0.511034	1.498927e-01	-0.288664	2.374202e-01	5.838600e-01	-0.00664651	0.147423	0.616863	0.0079104	-0.125147	0.344509	-0.0756603	0.383683	0.18102	0.129762	-0.42225	2.473747e-02	-0.123601	-0.210803	0.338026	-1.26553	0.164079	-0.415562	0.177782	-0.524478	-0.0604542	2.542954e-01	-0.171483
NONOXIPENT-PWY	0.253263	4.335085e-02	-0.131243	2.037739e-03	-0.0635481	-0.0780101	0.174452	-0.0961505	0.127024	1.893632e-03	0.0741793	2.750735e-01	1.759476e-01	0.00142456	-0.206867	-0.371626	0.0891689	-0.0628291	0.0788831	-0.0683563	-0.00226636	-0.127357	-0.083511	-0.056023	-0.089171	1.313222e-01	0.115911	0.178309	0.080342	0.0204189	-0.166538	0.0480328	-0.136855	0.0429776	0.0997436	0.140479	-0.0110288	5.107529e-02	6.144737e-02	-0.0570704	0.140119	0.0384418	0.0972035	-0.0707491	0.187712	5.629669e-02	-0.228913	-0.0964949	-0.204082
ENTBACSYN-PWY	-2.20871	1.517926e-01	1.035876e-01	4.145679e-02	6.966023e-01	2.935997e-01	0.375641	0.804735	-0.697449	1.591750e-01	-1.27383	-2.0665	-0.239978	-0.117805	0.549687	-1.17224	1.79234	4.586824e-01	0.475985	8.693478e-01	-0.105087	3.034620e-01	-0.55276	-0.587472	9.644627e-01	-0.345655	-0.830882	0.176057	-1.02946	-0.216411	-0.773265	-0.241571	0.324535	-0.949837	-0.6962	0.815751	3.495115e-01	9.718799e-01	-0.472472	8.516502e-02	0.71954	1.7213	-0.25122	4.328566e-01	-1.92484	8.802873e-01	-0.178445	7.248875e-01	0.938131
POLYAMSYN-PWY	0.557912	1.917612e-01	-0.107279	2.034378e-01	4.357702e-02	1.607683e-01	0.209888	0.162738	0.228767	-0.253385	0.371299	2.717757e-01	5.663437e-01	0.0936014	-0.920801	-0.268255	-1.19825	1.346367e-01	0.255331	-0.0906076	2.189212e-01	-0.928208	-1.13462	-0.185122	-0.330046	1.008133e+00	0.430871	1.2781	-0.367318	-0.00184171	0.125051	0.223896	-0.343631	0.213425	0.0935282	0.732694	3.022565e-01	-0.175334	1.661771e-01	5.707552e-01	0.390976	-0.947584	0.0222819	-0.784007	0.729005	-1.58067	-0.308177	-0.208157	-0.31451
GLYCOGENSYNTH-PWY	0.125534	1.244149e-01	-0.102453	1.229755e-01	-0.149698	-0.0864615	0.215168	-0.192959	0.392353	4.663047e-02	0.212144	1.313277e-01	2.113409e-01	0.0773953	-0.00758837	-0.121103	0.053163	6.611587e-03	0.00147458	-0.16019	-0.00930201	2.772310e-02	3.970385e-02	-0.179489	2.941367e-03	7.864523e-02	0.0521843	-0.45023	-0.0782446	0.165763	-0.0849413	0.245528	0.0682555	0.24867	0.197685	0.25914	1.133587e-01	1.989228e-01	1.250249e-01	3.360018e-02	0.110037	-0.333598	0.13275	9.924220e-02	-0.0348317	-0.449023	-0.152822	7.606230e-02	-0.0212484
THRESYN-PWY	0.140499	3.589388e-02	-0.133413	4.426960e-02	-0.0705904	-0.0628397	0.116276	-0.10665	0.196143	1.019557e-02	0.17128	1.949605e-01	1.518336e-01	0.0590825	-0.17875	-0.254417	0.326729	-0.0646341	0.104204	-0.02212	2.152673e-02	-0.0956402	-0.106984	-0.00928594	-0.0360925	3.374328e-01	0.129321	0.280176	-0.23724	0.0101388	-0.153194	0.0556832	-0.126971	0.0528673	0.0608055	0.262403	7.561758e-02	8.837679e-02	7.504120e-02	2.682352e-02	0.145309	0.234581	0.0678151	-0.0643647	0.208729	6.297022e-02	-0.188804	-0.174516	-0.23834
SER-GLYSYN-PWY	0.0781971	-0.0281052	-0.175555	-0.03598	-0.0440144	-0.0356143	-0.00966524	-0.110155	0.16556	-0.0223501	0.13346	2.574845e-01	5.374085e-03	0.0265625	-0.275366	-0.250082	0.377887	-0.0466217	0.0782505	3.285106e-02	3.747104e-02	-0.204689	4.267613e-02	5.282031e-02	-0.0785526	4.224492e-01	0.0502772	0.357117	0.309943	0.0550354	-0.0523265	0.0926354	-0.158435	0.0961639	0.0579638	0.366253	9.591889e-02	-0.00338199	4.859594e-03	2.563992e-02	0.118945	0.119504	0.0902774	-0.0969217	0.223885	1.601974e-01	-0.219265	-0.0546365	-0.0456913
Index	SLN009	SLN011	SLN013	SLN014	SLN015	SLN017	SLN021	SLN023	SLN024	SLN025	SLN027	SLN028	SLN030	SLN035	SLN037	SLN038	SLN039	SLN040	SLN041	SLN042	SLN047	SLN048	SLN049	SLN053	SLN054	SLN055	SLN056	SLN057	SLN059	SLN062	SLN063	SLN067	SLN068	SLN069	SLN070	SLN072	SLN073	SLN074	SLN076	SLN077	SLN081	SLN004	SLN005	SLN006	SLN007	SLN008	SLN012	SLN026	SLN032
PWY-5022	-0.425494	-0.10583	8.564023e-01	0.0863255	0.637669	0.640076	-0.659328	0.078391	-0.186356	-0.326801	0.304353	-0.254477	-0.442457	-0.371162	-1.55875	0.0586041	-1.0504	0.355883	8.264797e-02	-0.0444046	0.158669	-2.69378	0.775494	-0.229463	-1.05012	0.272004	-0.495171	0.411316	0.112788	-0.553716	-1.3672	0.635944	1.71813	-0.388715	-0.366587	5.745029e-01	-0.284505	-1.06066	-2.92697	-0.0709237	-2.5566	0.243973	-0.24146	-1.03176	-0.71358	0.170836	-0.76814	0.240055	0.490627
PWY-3781	0.18131	0.698158	-0.693338	0.389452	-0.613224	0.96942	0.374748	-0.350152	-1.07144	-0.919834	-0.806841	0.454552	-0.75241	-0.103397	-0.144452	0.318137	0.545071	0.617825	1.178472e-01	-0.348045	-1.21712	-2.32022	-0.922481	5.467752e-01	0.505757	0.142269	6.626475e-01	-0.323114	-0.343407	1.29413	0.584142	-2.11696	1.24204	2.453390e-01	-0.847776	-0.667326	4.637005e-01	-0.0353326	-0.378942	0.842649	-0.820573	0.711085	1.392492e-01	-1.44974	-0.081597	-0.231578	0.634595	0.0375146	0.61469
FUCCAT-PWY	0.292067	0.147658	2.176579e-01	0.602359	1.13777	-0.292266	-0.130085	0.0958203	0.714951	1.134344e+00	0.909036	-0.0330562	0.200416	-0.161089	1.489374e-01	0.953029	-0.162354	-0.368764	1.941910e-01	6.948880e-01	1.47551	-0.685175	0.3276	4.685818e-01	-0.0148574	-1.02668	5.225682e-01	1.05237	0.908735	0.0397328	0.410826	1.39343	-0.941605	4.348200e-01	0.240749	4.598328e-01	3.539534e-01	0.821851	0.21229	0.194708	-0.629721	0.00187693	1.363780e-01	-0.174845	-0.0493262	0.603433	0.359861	-0.300924	-0.00714314
PWY490-3	1.23727	0.587171	9.790211e-01	1.21033	2.62152	0.780914	1.24936	0.546829	1.05914	6.741954e-01	2.69154	2.48595	0.607023	0.17839	-0.208924	2.17042	-1.2067	1.33607	-0.132941	1.359622e+00	1.43993	-0.732475	2.08474	3.650017e-01	1.50311	0.093957	2.054363e+00	-1.54299	1.13416	1.53415	0.981237	0.786308	0.25682	-0.186034	0.99558	1.484369e+00	1.453900e+00	2.50653	0.263979	0.590675	0.178324	2.44939	1.367639e+00	9.961094e-01	0.668354	0.679317	-18.7594	0.458257	-2.92904
PWY-7003	0.598354	0.430663	-0.730992	0.985202	-0.270096	-1.26287	-0.309546	0.878931	1.37847	7.434622e-01	0.0655331	0.613795	0.800435	0.693771	6.293967e-01	0.725934	0.355297	-0.61573	5.672613e-01	1.234919e+00	-0.58655	5.355882e-01	-0.356225	7.391436e-01	0.575331	-1.78084	3.785268e-01	-1.67361	-0.118177	0.0720084	0.279021	0.7907	0.322043	9.668784e-01	0.495632	1.065195e+00	2.755768e-01	1.62074	0.311877	-1.62402	-0.854413	-0.883235	-0.524614	6.013588e-01	-0.308701	-0.724321	-0.0213625	0.104445	0.508571
PWY-6167	-0.99694	16.9556	-0.99694	-0.99694	15.8827	-0.99694	-0.99694	-0.99694	-0.99694	-0.99694	-0.99694	-0.99694	-0.99694	-0.99694	-0.99694	-0.99694	-0.99694	-0.99694	-0.99694	-0.99694	-0.99694	-0.99694	-0.99694	-0.99694	-0.99694	-0.99694	1.412713e+01	-0.99694	-0.99694	17.4174	-0.99694	-0.99694	-0.99694	-0.99694	-0.99694	-0.99694	1.563150e+01	16.7933	-0.99694	-0.99694	-0.99694	-0.99694	-0.99694	-0.99694	-0.99694	-0.99694	-0.99694	-0.99694	-0.99694
PWY-6654	-0.96452	16.4328	-0.96452	-0.96452	15.335	-0.96452	-0.96452	-0.96452	-0.96452	-0.96452	-0.96452	-0.96452	-0.96452	-0.96452	-0.96452	-0.96452	-0.96452	-0.96452	-0.96452	-0.96452	-0.96452	-0.96452	-0.96452	-0.96452	-0.96452	-0.96452	1.354405e+01	-0.96452	-0.96452	16.8749	-0.96452	-0.96452	-0.96452	-0.96452	-0.96452	-0.96452	1.515319e+01	16.3154	-0.96452	-0.96452	-0.96452	-0.96452	-0.96452	-0.96452	-0.96452	-0.96452	-0.96452	-0.96452	-0.96452
LEU-DEG2-PWY	0.272162	2.24026	1.367449e+00	0.510593	0.423661	1.28217	1.68772	-0.856488	-0.601486	6.276157e-01	-3.31901	2.71161	-1.2539	0.666612	4.017838e-01	2.63144	3.33391	1.60917	-0.254142	8.383727e-01	-18.7382	4.370156e-01	-0.768217	-0.736119	2.42387	0.314074	1.555493e+00	-18.7382	-18.7382	2.24807	0.913118	-0.73619	4.98984	1.390359e+00	-1.73088	-0.278036	-0.0958903	2.60443	-18.7382	1.58819	0.34821	1.69311	-0.216177	6.328279e-01	1.18464	0.91615	1.97153	1.60956	3.82405
PWY-7332	-0.0326373	0.248887	2.360202e-01	0.250347	-0.827118	0.41246	0.632633	0.799629	0.178507	-1.21001	-0.346182	-0.845366	-0.257272	-0.0542271	2.332898e-01	0.0541459	-0.234325	1.02179	6.643961e-01	-0.28971	-2.05224	-1.63296	-0.792251	-0.388106	0.90079	0.87425	-0.692349	-3.44999	-2.40468	0.458321	0.144081	-0.934675	-0.338982	8.707129e-01	0.421814	3.638237e-01	-0.464131	0.780121	0.298936	0.134398	-0.435593	-2.00051	-0.184601	-0.255092	0.470049	-0.99791	-1.52714	1.46128	-0.0434977
PWY-7094	-0.706876	1.11348	-0.706137	0.857058	-1.01579	1.23602	-0.607837	-0.727533	-1.24718	-0.998802	-2.3759	0.800604	-1.11688	0.114164	-0.174843	0.732838	1.64171	1.36343	-0.182085	-0.879893	-3.9865	-1.83628	-0.0477418	2.643512e-02	1.27248	0.671027	1.257317e+00	-2.79893	-2.90123	2.58303	1.26523	-1.87197	3.27355	7.025619e-01	-1.18173	-1.06114	4.262914e-01	0.422228	-1.60485	0.81788	-1.08059	0.556958	-0.871432	-1.57087	-0.00132696	-0.581819	0.398842	0.0011923	2.14685
[truncated: 71 more columns]
